# Supplementary material
Source: Springer Nature journal article supplement (https://www.springermedizin.de/resource/supplementary/13075_2006_1862_MOESM6_ESM.pdf/9690750)

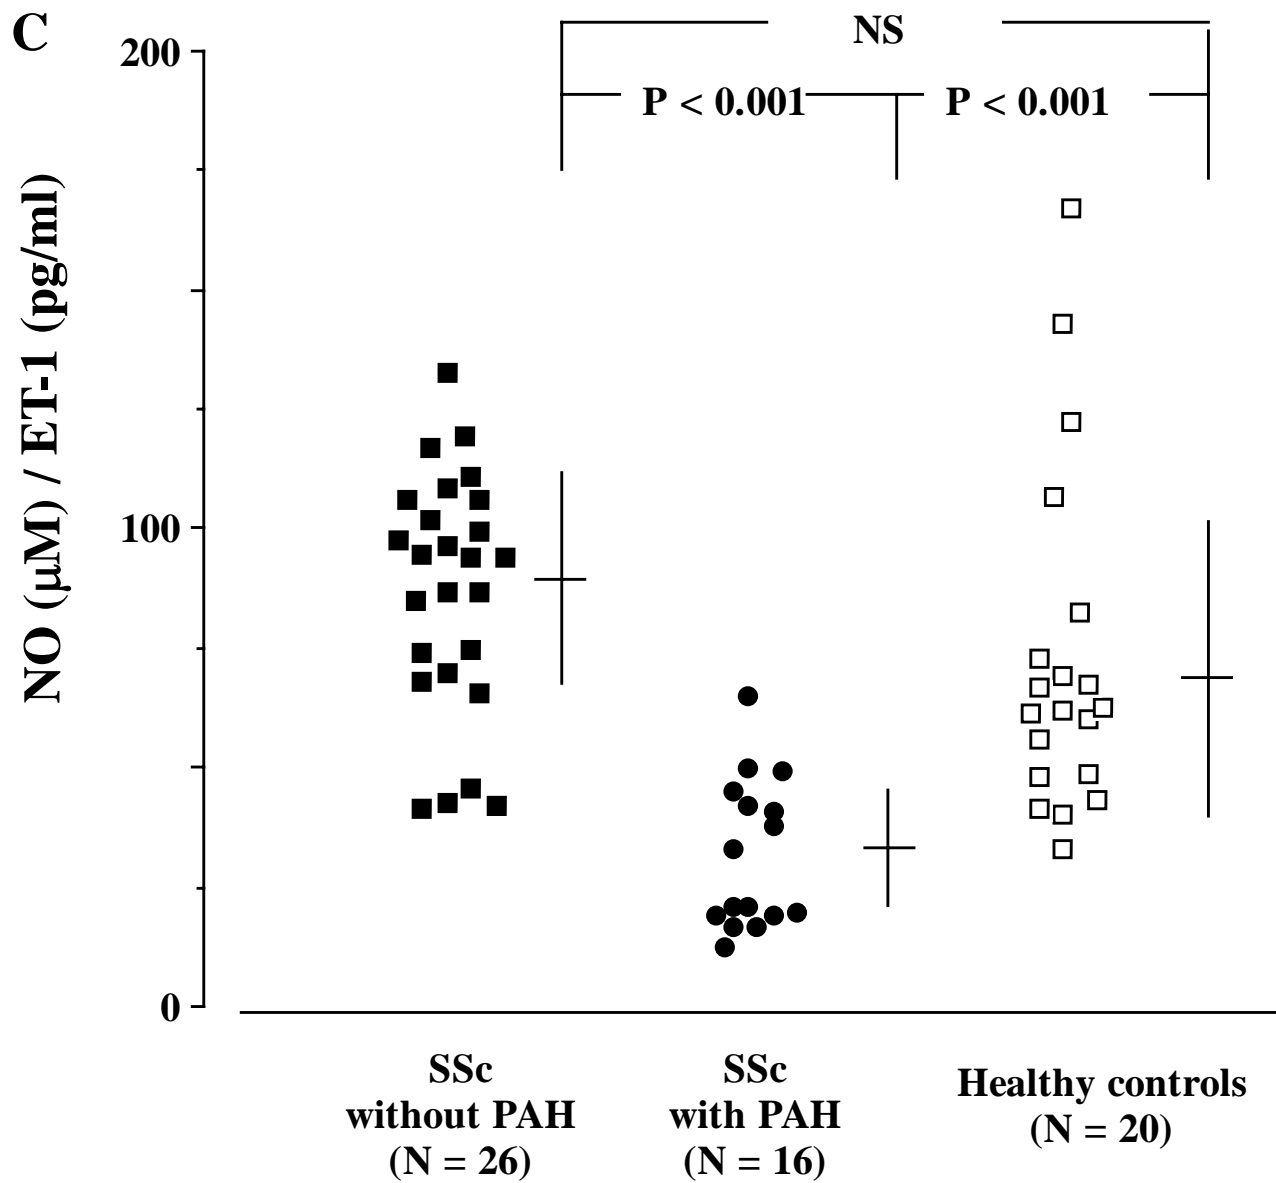

Figure 3C. Kawaguchi Y et al

Supplement: MOESM6 [file 9690750]
